# Supplementary material for: Exploratory Quality Control Study for Polygonum multiflorum Thunb. Using Dinuclear Anthraquinones with Potential Hepatotoxicity
Source: MDPI journal article supplement (doi:10.3390/molecules27196760), 2022-10-10
Supplement: s1 [file s1]

## Article

# Exploratory Quality Control Study for *Polygonum multiflorum* Thunb. using Dinuclear Anthraquinones with potential hepatotoxicity

Huiyu Gao <sup>1,†</sup>, Jianbo Yang <sup>1,†</sup>, Xueting Wang <sup>1</sup>, Yunfei Song <sup>1,2</sup>, Xianlong Cheng <sup>1</sup>, Feng Wei <sup>1,\*</sup>, Ying Wang <sup>1</sup>, Donglin Gu <sup>1</sup>, Hua Sun <sup>3</sup> and Shuangcheng Ma <sup>1,\*</sup>

<sup>1</sup> Institute for Control of Chinese Traditional Medicine and Ethnic Medicine, National Institutes for Food and Drug Control, Beijing 102600, China

<sup>2</sup> School of Chinese Materia Medica, Beijing University of Chinese Medicine, Beijing, 102488, China

<sup>3</sup> Chinese Academy of Medical Sciences & Peking Union Medical College, Beijing 100050, China

\* Correspondence: weifeng@nifdc.org.cn (F.W.); masc@nifdc.org.cn (S.M.); Tel.: +86-10-53852020 (F.W.); +86-10-53852076 (S.M.)

† These authors contributed equally to this work

## Supplementary Materials

**Table S1.** Contents of free dianthrone in PMR.

| Samples | Batch Number | Contents of analytes (µg/g) |         |         |         |         |         | Total <sup>△</sup> |
|---------|--------------|-----------------------------|---------|---------|---------|---------|---------|--------------------|
|         |              | 1                           | 2       | 3       | 4       | 5       | 6       |                    |
| PMR-01  | AHBZ202001   | 0.2395                      | 0.5175  | 0.0643  | 0.0467  | 0.0640  | 0.0424  | 0.9744             |
| PMR-02  | AHBZ202002   | 1.2660                      | 0.5417  | 0.5121  | 0.4323  | 0.7091  | 0.3573  | 3.8185             |
| PMR-03  | AHBZ202003   | 1.0006                      | 0.7852  | 0.9106  | 0.9739  | 2.6917  | 1.1963  | 7.5583             |
| PMR-04  | AHBZ202004   | 1.3388                      | 1.1351  | 0.8042  | 1.1238  | 2.2179  | 1.2528  | 7.8726             |
| PMR-05  | AHBZ202005   | 2.6980                      | 2.4985  | 2.1521  | 2.3733  | 5.9698  | 24.5818 | 40.2735            |
| PMR-06  | AH FY202001  | 0.4121                      | 0.3304  | 0.1888  | 0.3053  | 0.6596  | 0.2784  | 2.1746             |
| PMR-07  | AH FY202002  | 0.8260                      | 0.5518  | 0.7964  | 0.8730  | 2.5438  | 1.4055  | 6.9965             |
| PMR-08  | AH FY202003  | 0.7513                      | 0.5388  | 0.9397  | 0.8948  | 3.6365  | 1.7461  | 8.5072             |
| PMR-09  | AH FY202004  | 0.9865                      | 0.0886  | 0.4651  | 0.2463  | 0.8397  | 0.1518  | 2.778              |
| PMR-10  | AH FY202005  | 0.9639                      | 0.1551  | 0.4534  | 0.2206  | 0.3169  | 0.1910  | 2.3009             |
| PMR-11  | GDGZ202002   | 72.0310                     | 63.0322 | 59.2059 | 64.2005 | 53.0040 | 37.2258 | 348.6994           |
| PMR-12  | GDGZ202003   | 64.0366                     | 61.9686 | 63.8661 | 67.3944 | 46.2105 | 31.5802 | 335.0564           |
| PMR-13  | GDGZ202004   | 64.5061                     | 59.7736 | 56.2312 | 58.1959 | 75.0201 | 34.6500 | 348.3769           |
| PMR-14  | GDGZ202005   | 76.8091                     | 71.7398 | 61.3272 | 63.6051 | 73.1711 | 33.7220 | 380.3743           |
| PMR-15  | SCDZ202001   | 0.2483                      | 0.6101  | 0.3726  | 0.3818  | 0.2878  | 0.1355  | 2.0361             |
| PMR-16  | SCDZ202002   | 4.6900                      | 3.6934  | 2.4969  | 2.5346  | 4.0790  | 1.6115  | 19.1054            |
| PMR-17  | SCDZ202003   | 14.3823                     | 9.9849  | 11.2485 | 10.4674 | 19.7349 | 8.2563  | 74.0743            |
| PMR-18  | SCDZ202004   | 35.2265                     | 28.5175 | 23.1835 | 22.9777 | 36.6123 | 16.0731 | 162.5906           |
| PMR-19  | SCDZ202005   | 9.2559                      | 6.4017  | 2.6982  | 2.6204  | 2.2766  | 1.0394  | 24.2922            |
| PMR-20  | SCYB202001   | 8.7492                      | 7.1704  | 6.1274  | 6.3185  | 13.1049 | 5.4630  | 46.9334            |
| PMR-21  | SCYB202002   | 15.1794                     | 11.0861 | 10.3946 | 10.3586 | 20.1022 | 8.2738  | 75.3947            |
| PMR-22  | SCYB202003   | 7.2280                      | 6.2994  | 5.6975  | 6.0441  | 13.1601 | 5.2547  | 43.6838            |
| PMR-23  | SCYB202004   | 7.1003                      | 6.1151  | 5.3397  | 5.7406  | 11.9352 | 5.3909  | 41.6218            |
| PMR-24  | SCYB202005   | 13.1142                     | 8.8357  | 7.1588  | 7.1281  | 10.6656 | 4.7937  | 51.6961            |
| PMR-25  | GZKL202001   | 4.4360                      | 4.5713  | 3.1117  | 3.4860  | 7.2845  | 2.9515  | 25.841             |
| PMR-26  | GZKL202002   | 5.7612                      | 5.6835  | 5.4832  | 5.8382  | 14.1750 | 5.6722  | 42.6133            |
| PMR-27  | GZKL202003   | 4.6648                      | 5.1173  | 3.9051  | 4.4296  | 10.9197 | 4.0335  | 33.07              |
| PMR-28  | GZKL202004   | 8.4560                      | 8.8157  | 7.0238  | 7.9926  | 18.3918 | 7.5759  | 58.2558            |

|        |              |         |         |         |         |          |         |          |
|--------|--------------|---------|---------|---------|---------|----------|---------|----------|
| PMR-29 | GZKL202005   | 8.7958  | 9.6978  | 5.8432  | 6.4548  | 12.5886  | 4.8962  | 48.2764  |
| PMR-30 | GZBJ202001   | 0.3710  | 0.3995  | 0.2666  | 0.3200  | 0.5866   | 0.2918  | 2.2355   |
| PMR-31 | GZBJ202002   | 0.1186  | 0.1278  | 0.1218  | 0.1440  | 0.4094   | 0.1663  | 1.0879   |
| PMR-32 | GZBJ202003   | 0.0813  | 0.0803  | 0.1049  | 0.1133  | 0.3133   | 0.1537  | 0.8468   |
| PMR-33 | GZBJ202004   | 0.8578  | 0.9532  | 0.5969  | 0.6553  | 1.2617   | 0.5594  | 4.8843   |
| PMR-34 | GZBJ202005   | 1.5167  | 1.7548  | 1.1213  | 1.2881  | 3.0908   | 1.3332  | 10.1049  |
| PMR-35 | GZAS202001   | 15.6055 | 17.5438 | 11.3977 | 13.3958 | 33.9562  | 14.1433 | 106.0423 |
| PMR-36 | GZAS202002   | 19.4390 | 22.0845 | 13.4459 | 14.9028 | 32.2931  | 14.0846 | 116.2499 |
| PMR-37 | GZAS202003   | 9.2096  | 10.1663 | 8.7225  | 9.7620  | 26.4248  | 11.2651 | 75.5503  |
| PMR-38 | GZAS202004   | 6.9156  | 7.4652  | 5.5873  | 6.4877  | 13.8430  | 5.7486  | 46.0474  |
| PMR-39 | GZAS202005   | 19.6010 | 21.9899 | 15.5834 | 17.8051 | 46.1957  | 19.1504 | 140.3255 |
| PMR-40 | GZTR202001   | 2.2621  | 2.6517  | 1.6851  | 1.9864  | 5.7646   | 2.2716  | 16.6215  |
| PMR-41 | GZTR202002   | 2.6692  | 3.1115  | 1.9317  | 2.1731  | 5.7187   | 2.4296  | 18.0338  |
| PMR-42 | GZTR202003   | 1.6258  | 1.8518  | 1.4298  | 1.5947  | 4.4652   | 1.8562  | 12.8235  |
| PMR-43 | GZTR202004   | 2.6159  | 3.0663  | 2.0064  | 2.0209  | 6.2378   | 13.8484 | 29.7957  |
| PMR-44 | GZTR202005   | 0.1463  | 0.9422  | 0.1948  | 0.2265  | 0.8003   | 0.3167  | 2.6268   |
| PMR-45 | YNHH20201101 | 10.1722 | 9.1809  | 7.4501  | 7.8558  | 17.5398  | 8.0480  | 60.2468  |
| PMR-46 | YNWS202002   | 4.9153  | 3.5966  | 2.9336  | 2.8624  | 7.7683   | 3.3382  | 25.4144  |
| PMR-47 | YNWS202003   | 7.6960  | 6.1698  | 5.0461  | 4.9041  | 13.4868  | 5.3652  | 42.668   |
| PMR-48 | YNWS202004   | 2.3333  | 1.3810  | 1.5781  | 1.4537  | 5.0486   | 2.3144  | 14.1091  |
| PMR-49 | YNWS202005   | 14.0761 | 13.6632 | 12.5066 | 13.3863 | 54.2692  | 22.3430 | 130.2444 |
| PMR-50 | YNQJ202001   | 5.0686  | 3.6480  | 3.3502  | 3.2861  | 7.9063   | 3.5563  | 26.8155  |
| PMR-51 | YNQJ202002   | 10.7646 | 10.9368 | 8.2626  | 8.9494  | 23.5746  | 9.7494  | 72.2374  |
| PMR-52 | YNQJ202003   | 15.1922 | 14.2283 | 10.7753 | 10.8187 | 22.6107  | 9.4178  | 83.043   |
| PMR-53 | YNQJ202004   | 6.7141  | 5.1772  | 4.8731  | 4.7347  | 9.3661   | 4.3819  | 35.2471  |
| PMR-54 | YNQJ202005   | 0.7319  | 0.4085  | 0.9288  | 0.8719  | 3.8983   | 1.5935  | 8.4329   |
| PMR-55 | YNQJ20201101 | 26.9930 | 18.3799 | 25.2812 | 24.7760 | 86.9190  | 32.0650 | 214.4141 |
| PMR-56 | GDDQ202109   | 4.0790  | 1.6728  | 2.8613  | 2.6000  | 3.6367   | 1.8888  | 16.7386  |
| PMR-57 | GDDQ2020     | 39.8238 | 38.4998 | 50.6853 | 44.1359 | 113.3277 | 73.5961 | 360.0686 |
| PMR-58 | GDDQ-1NQ-1   | 8.4463  | 10.7348 | 8.2408  | 9.8430  | 38.2572  | 13.6106 | 89.1327  |
| PMR-59 | GDDQ-1NQ-2   | 4.1493  | 4.8934  | 4.2004  | 4.7226  | 16.0713  | 6.3531  | 40.3901  |
| PMR-60 | GDDQ-1NQ-3   | 4.9853  | 5.7515  | 4.3289  | 4.8566  | 14.4549  | 5.1687  | 39.5459  |
| PMR-61 | GDDQ-1NQ-4   | 3.1272  | 3.1105  | 2.8775  | 3.1513  | 10.3475  | 3.6803  | 26.2943  |
| PMR-62 | GDDQ-1NQ-5   | 7.7492  | 9.9420  | 8.5174  | 9.8373  | 44.4808  | 16.2467 | 96.7734  |
| PMR-63 | GDDQ-2NQ-1   | 5.0700  | 6.3349  | 5.7655  | 6.6218  | 29.3260  | 10.9279 | 64.0461  |
| PMR-64 | GDDQ-2NQ-2   | 4.2366  | 4.5830  | 4.1882  | 4.8453  | 16.9752  | 7.0166  | 41.8449  |
| PMR-65 | GDDQ-2NQ-3   | 6.5193  | 8.1737  | 6.4709  | 7.4134  | 28.9470  | 11.2509 | 68.7752  |
| PMR-66 | GDDQ-2NQ-4   | 3.6876  | 2.4314  | 2.6999  | 3.1484  | 16.5265  | 6.0976  | 34.5914  |
| PMR-67 | GDDQ-2NQ-5   | 4.7314  | 5.6643  | 4.5871  | 5.1391  | 15.9686  | 5.7854  | 41.8759  |
| PMR-68 | GDDQ-3NQ-1   | 2.6865  | 3.0152  | 3.2494  | 3.7024  | 16.0974  | 5.5573  | 34.3082  |
| PMR-69 | GDDQ-3NQ-2   | 2.2473  | 2.4765  | 2.7302  | 3.1680  | 14.6158  | 5.1880  | 30.4258  |
| PMR-70 | GDDQ-3NQ-3   | 2.9730  | 3.8137  | 3.8154  | 4.2450  | 19.5624  | 6.8140  | 41.2235  |
| PMR-71 | GDDQ-3NQ-4   | 2.1730  | 2.4436  | 3.0138  | 3.3788  | 16.9050  | 5.7368  | 33.651   |
| PMR-72 | GDDQ-3NQ-5   | 1.0927  | 1.1420  | 1.4584  | 1.5930  | 7.9614   | 2.8537  | 16.1012  |
| PMR-73 | GDDQ-4NQ-1   | 1.1056  | 1.2292  | 1.3755  | 1.6341  | 7.7680   | 2.8814  | 15.9938  |
| PMR-74 | GDDQ-4NQ-2   | 2.8829  | 3.7151  | 3.5472  | 4.2084  | 17.9742  | 6.1962  | 38.524   |
| PMR-75 | GDDQ-4NQ-3   | 3.0047  | 3.5324  | 3.1769  | 3.6740  | 14.3967  | 4.9574  | 32.7421  |
| PMR-76 | GDDQ-4NQ-4   | 2.4191  | 2.6001  | 2.6129  | 2.9144  | 11.4294  | 3.4791  | 25.455   |
| PMR-77 | GDDQ-4NQ-5   | 2.7111  | 3.3084  | 3.3873  | 3.7605  | 16.3031  | 5.6654  | 35.1358  |
| PMR-78 | GDDQ-5NQ-1   | 2.9051  | 3.6573  | 3.3128  | 3.8702  | 15.6144  | 6.2419  | 35.6017  |
| PMR-79 | GDDQ-5NQ-2   | 2.2383  | 2.6039  | 2.5724  | 2.9636  | 11.9649  | 4.6200  | 26.9631  |
| PMR-80 | GDDQ-5NQ-3   | 6.9379  | 0.8984  | 7.6715  | 8.9943  | 34.5678  | 13.2128 | 72.2827  |
| PMR-81 | GDDQ-5NQ-4   | 1.8152  | 2.2026  | 2.2054  | 2.4565  | 10.0729  | 3.8902  | 22.6428  |

|        |            |        |        |        |        |         |        |         |
|--------|------------|--------|--------|--------|--------|---------|--------|---------|
| PMR-82 | GDDQ-5NQ-5 | 2.1998 | 2.2092 | 2.1214 | 2.3251 | 8.2151  | 3.3458 | 20.4164 |
| PMR-83 | GDDQ-6NQ-1 | 1.5630 | 1.6442 | 1.9100 | 2.1454 | 11.3631 | 4.4167 | 23.0424 |
| PMR-84 | GDDQ-6NQ-2 | 1.4284 | 1.7851 | 2.2789 | 2.5179 | 13.1420 | 5.2645 | 26.4168 |
| PMR-85 | GDDQ-6NQ-3 | 1.2656 | 1.1414 | 1.3907 | 1.5105 | 7.0037  | 2.6303 | 14.9422 |
| PMR-86 | GDDQ-6NQ-4 | 1.4171 | 1.4120 | 1.3003 | 1.4128 | 5.7009  | 2.1451 | 13.3882 |
| PMR-87 | GDDQ-6NQ-5 | 0.8313 | 0.6967 | 0.7947 | 0.8454 | 3.8302  | 1.5249 | 8.5232  |
| PMR-88 | GDDQ-5NC-1 | 1.2186 | 1.3126 | 1.6989 | 1.9310 | 9.1994  | 3.6842 | 19.0447 |
| PMR-89 | GDDQ-5NC-2 | 3.8728 | 4.1589 | 4.0331 | 4.5712 | 14.3139 | 5.9859 | 36.9358 |
| PMR-90 | GDDQ-5NC-3 | 2.1411 | 1.8629 | 1.9171 | 2.1268 | 6.4340  | 2.6741 | 17.156  |
| PMR-91 | GDDQ-5NC-4 | 0.6700 | 0.5645 | 0.8043 | 0.8872 | 4.2172  | 1.4918 | 8.635   |
| PMR-92 | GDDQ-5NC-5 | 3.3708 | 3.9064 | 3.7186 | 4.2019 | 15.0069 | 6.0827 | 36.2873 |
| PMR-93 | GDDQ-5NX-1 | 0.1153 | 0.0189 | 0.1033 | 0.0631 | 0.1990  | 0.1017 | 0.6013  |
| PMR-94 | GDDQ-5NX-2 | 2.6308 | 2.3429 | 2.4170 | 2.4832 | 5.7160  | 2.2472 | 17.8371 |
| PMR-95 | GDDQ-5NX-3 | 0.2385 | 0.1278 | 0.1844 | 0.1617 | 0.4144  | 0.1777 | 1.3045  |
| PMR-96 | GDDQ-5NX-4 | 0.8055 | 0.7023 | 0.6889 | 0.6730 | 1.7798  | 0.6967 | 5.3462  |
| PMR-97 | GDDQ-5NX-5 | 3.2798 | 3.4518 | 2.9309 | 3.3186 | 8.9035  | 3.6217 | 25.5063 |

<sup>a</sup> The sum of the contents of the six compounds.

**Table S2.** Contents of 6 compounds in PMR and PMRP collected from herb markets and pharmaceutical companies.

| Samples | Batch Number  |   | Contents of analytes (µg/g) |         |         |         |         |         | total <sup>Δ</sup> |
|---------|---------------|---|-----------------------------|---------|---------|---------|---------|---------|--------------------|
|         |               |   | 1                           | 2       | 3       | 4       | 5       | 6       |                    |
| PRMP-01 | AHBZSC202001Z | a | 0.2924                      | 0.3140  | 0.4902  | 0.4709  | 0.9598  | 0.6729  | 3.2002             |
|         |               | b | 1.6951                      | 1.5458  | 1.1980  | 1.1230  | 1.5671  | 1.1757  | 8.3047             |
| PRMP-02 | AHBZSC202002Z | a | 0.6855                      | 0.7613  | 1.1347  | 1.2025  | 2.7927  | 2.0127  | 8.5894             |
|         |               | b | 1.9509                      | 1.6996  | 1.6652  | 1.6107  | 2.7997  | 2.1923  | 11.9184            |
| PRMP-03 | AHBZSC202003Z | a | 0.3441                      | 0.3901  | 0.6264  | 0.6697  | 1.4463  | 1.0651  | 4.5417             |
|         |               | b | 0.8297                      | 0.7630  | 0.7882  | 0.7378  | 1.3794  | 1.0677  | 5.5658             |
| PRMP-04 | AHBZSC202004Z | a | 0.3413                      | 0.4162  | 0.5560  | 0.5921  | 1.0822  | 0.7824  | 3.7702             |
|         |               | b | 1.1471                      | 1.0549  | 0.8601  | 0.7798  | 1.0346  | 0.6899  | 5.5664             |
| PRMP-05 | AHBZSC202005Z | a | 0.0276                      | 0.0920  | 0.1637  | 0.1733  | 0.4604  | 0.3664  | 1.2834             |
|         |               | b | 0.3268                      | 0.3168  | 0.2428  | 0.2297  | 0.3703  | 0.3836  | 1.87               |
| PRMP-06 | SW01          | a | 0.0090                      | 0.0078  | 0.1406  | 0.2749  | 0.5127  | 0.2421  | 1.1871             |
|         |               | b | 0.0201                      | 0.0070  | 0.1583  | 0.3452  | 0.2890  | 0.0110  | 0.8306             |
| PRMP-07 | SW02          | a | 0.0072                      | 0.0058  | 0.0838  | 0.1300  | 0.1939  | 0.0035  | 0.4242             |
|         |               | b | 0.0132                      | 0.0039  | 0.0460  | 0.0991  | 0.0637  | 0.0042  | 0.2301             |
| PRMP-08 | SW03          | a | 0.0399                      | 0.0124  | 0.1844  | 0.3329  | 0.5204  | 0.2329  | 1.3229             |
|         |               | b | 0.0192                      | 0.0055  | 0.1528  | 0.3045  | 0.3112  | 0.0104  | 0.8036             |
| PRMP-09 | SW04          | a | 0.0144                      | 0.0273  | 0.1253  | 0.2111  | 0.2925  | 0.0610  | 0.7316             |
|         |               | b | 0.0176                      | 0.0045  | 0.0976  | 0.0793  | 0.1434  | 0.0065  | 0.3489             |
| PRMP-10 | SW05          | a | 0.0076                      | 0.0223  | 0.0942  | 0.1569  | 0.2396  | 0.0047  | 0.5253             |
|         |               | b | 0.0133                      | 0.0034  | 0.0486  | 0.0991  | 0.0741  | 0.0049  | 0.2434             |
| PRMP-11 | SW06          | a | 0.0771                      | 0.4266  | 0.2059  | 0.3647  | 0.4167  | 0.1503  | 1.6413             |
|         |               | b | 0.0341                      | 0.0066  | 0.1634  | 0.3234  | 0.2207  | 0.0081  | 0.7563             |
| PRMP-12 | GXYLSC202001Z | a | ND *                        | ND *    | ND *    | ND *    | ND *    | ND *    | 0                  |
|         |               | b | ND *                        | ND *    | ND *    | ND *    | ND *    | ND *    | 0                  |
| PRMP-13 | SXXASC202001Z | a | 0.6795                      | 0.6708  | 1.1730  | 2.2552  | 2.8511  | 1.8511  | 9.4807             |
|         |               | b | 10.6146                     | 7.8054  | 5.8071  | 8.2531  | 5.3551  | 2.7923  | 40.6276            |
| PRMP-14 | HBAGSC202001Z | a | 2.3755                      | 2.3992  | 2.9439  | 6.0064  | 5.2643  | 3.9680  | 22.9573            |
|         |               | b | 2.8126                      | 2.9609  | 2.9360  | 6.0261  | 4.4363  | 3.0131  | 22.185             |
| PRMP-15 | GDDQ          | a | 0.3665                      | 0.4871  | 0.3177  | 0.7658  | 0.3429  | 0.1918  | 2.4718             |
|         |               | b | 17.5481                     | 22.6380 | 14.3351 | 37.3134 | 17.0336 | 16.0577 | 124.9259           |
| PRMP-16 | AHWST01       | a | 0.0265                      | 0.0331  | 0.0743  | 0.0617  | 0.0662  | 0.0759  | 0.3377             |

|         |                   |   |          |         |         |         |         |         |          |
|---------|-------------------|---|----------|---------|---------|---------|---------|---------|----------|
|         |                   | b | 0.6928   | 0.6422  | 0.3911  | 0.3604  | 0.1764  | 0.1373  | 2.4002   |
| PRMP-17 | AHWST02           | a | 0.0423   | 0.0462  | 0.1050  | 0.1022  | 0.1637  | 0.1241  | 0.5835   |
|         |                   | b | 0.7246   | 0.7303  | 0.4463  | 0.4551  | 0.3368  | 0.2848  | 2.9779   |
| PRMP-18 | AHWST03           | a | 0.3389   | 0.3375  | 0.4372  | 0.4587  | 0.7894  | 0.5599  | 2.9216   |
|         |                   | b | 4.0049   | 3.9154  | 2.1743  | 2.2890  | 1.5454  | 1.1733  | 15.1023  |
| PRMP-19 | AHWST04           | a | 0.2253   | 0.2290  | 0.2897  | 0.3028  | 0.5039  | 0.3700  | 1.9207   |
|         |                   | b | 3.4735   | 3.1429  | 1.7723  | 1.8280  | 1.3079  | 0.9631  | 12.4877  |
| PRMP-20 | AHWST05           | a | 0.1864   | 0.1811  | 0.2507  | 0.2772  | 0.4054  | 0.3242  | 1.625    |
|         |                   | b | 2.8894   | 2.5030  | 1.4656  | 1.3591  | 0.9173  | 0.5630  | 9.6974   |
| PRMP-21 | AHWST06           | a | 0.1225   | 0.1236  | 0.2084  | 0.2068  | 0.3719  | 0.2445  | 1.2777   |
|         |                   | b | 2.0302   | 1.8442  | 1.0533  | 1.0160  | 0.6315  | 0.5426  | 7.1178   |
| PRMP-22 | AHWST07           | a | 0.1896   | 0.1601  | 0.3314  | 0.2949  | 0.5890  | 0.3570  | 1.922    |
|         |                   | b | 0.5931   | 0.5730  | 0.4903  | 0.4693  | 0.5081  | 0.3915  | 3.0253   |
| PRMP-23 | 2015G0624         | a | 0.8986   | 1.5427  | 1.4309  | 1.5417  | 1.8641  | 1.4107  | 8.6887   |
|         |                   | b | 7.9831   | 9.6812  | 4.1572  | 5.4302  | 3.2718  | 2.2810  | 32.8045  |
| PRMP-24 | 2015G0057         | a | 6.0446   | 5.0787  | 8.1804  | 8.5416  | 11.9543 | 8.2166  | 48.0162  |
|         |                   | b | 19.2698  | 22.0699 | 16.0484 | 19.4401 | 17.0633 | 13.4773 | 107.3688 |
| PRMP-25 | 2015G0371         | a | 5.9810   | 5.0892  | 8.9669  | 9.4526  | 13.7182 | 8.9840  | 52.1919  |
|         |                   | b | 13.5853  | 14.1080 | 13.1322 | 14.3224 | 14.4622 | 11.2716 | 80.8817  |
| PRMP-26 | 2015G0251         | a | 13.7428  | 15.5444 | 9.9900  | 12.2314 | 9.3771  | 7.1689  | 68.0546  |
|         |                   | b | 64.7599  | 67.0548 | 43.4503 | 53.3514 | 37.9111 | 30.6754 | 297.2029 |
| PRMP-27 | 2015G0162         | a | 9.3711   | 10.3503 | 5.2289  | 5.9066  | 4.2295  | 3.4136  | 38.5     |
|         |                   | b | 8.7480   | 9.9210  | 4.8213  | 5.2348  | 2.9415  | 1.8531  | 33.5197  |
| PRMP-28 | 2015G0239         | a | 8.5469   | 10.7631 | 5.4469  | 7.1152  | 5.1532  | 3.8169  | 40.8422  |
|         |                   | b | 47.8774  | 53.3681 | 34.8343 | 46.0596 | 33.8902 | 32.1337 | 248.1633 |
| PRMP-29 | 2015G0375         | a | 8.6649   | 9.3339  | 9.2268  | 10.3908 | 13.8583 | 9.9376  | 61.4123  |
|         |                   | b | 13.8750  | 15.6238 | 13.2851 | 15.0111 | 16.6278 | 14.0312 | 88.454   |
| PRMP-30 | 2015G0625         | a | 8.3069   | 8.3127  | 16.8973 | 18.1693 | 48.4669 | 35.0726 | 135.2257 |
|         |                   | b | 23.0288  | 19.0677 | 24.1761 | 22.5738 | 48.8397 | 35.1981 | 172.8842 |
| PRM-98  | 20211122-GSJN-S01 | a | 9.5383   | 6.8713  | 4.4099  | 4.4243  | 3.3176  | 2.5253  | 31.0867  |
|         |                   | b | 21.7565  | 21.0313 | 11.0361 | 13.8539 | 26.2990 | 8.7785  | 102.7553 |
| PRM-99  | 20211122-GSJN-S02 | a | 8.9198   | 6.2178  | 4.2431  | 4.0237  | 3.0219  | 2.3070  | 28.7333  |
|         |                   | b | 20.4897  | 20.3125 | 10.7350 | 13.2151 | 26.2901 | 7.9001  | 98.9425  |
| PRMP-31 | 20211122-GSJN-Z01 | a | 0.4231   | 0.3768  | 0.5226  | 0.5147  | 0.9879  | 0.6963  | 3.5214   |
|         |                   | b | 2.9650   | 3.6230  | 1.8921  | 2.3509  | 2.1666  | 1.4921  | 14.4897  |
| PRMP-32 | 20211122-GSJN-Z02 | a | 0.4729   | 0.3675  | 0.6770  | 0.6486  | 1.0477  | 0.6756  | 3.8893   |
|         |                   | b | 2.9066   | 3.3712  | 1.5753  | 2.4692  | 1.8915  | 1.2646  | 13.4784  |
| PRMP-33 | 20211122-GSJN-Z03 | a | 0.2649   | 0.2397  | 0.4164  | 0.3744  | 0.9039  | 0.6542  | 2.8535   |
|         |                   | b | 1.1005   | 1.0646  | 0.7893  | 0.7610  | 1.3441  | 0.8788  | 5.9383   |
| PRMP-34 | 20211122-GSJN-Z04 | a | 0.1476   | 0.1292  | 0.2534  | 0.2079  | 0.5603  | 0.3102  | 1.6086   |
|         |                   | b | 0.9127   | 0.8188  | 0.6159  | 0.5200  | 0.7842  | 0.5030  | 4.1546   |
| PMP-100 | 210901-1          | a | 110.8115 | 89.2393 | 60.7679 | 65.5450 | 65.2657 | 51.1096 | 442.739  |
|         |                   | b | 35.1888  | 33.4687 | 13.6371 | 21.0371 | 16.6803 | 14.0145 | 134.0265 |
| PMP-101 | 210901-2          | a | 109.5964 | 81.2675 | 64.2949 | 68.0623 | 66.2652 | 50.8741 | 440.3604 |
|         |                   | b | 28.4709  | 26.7475 | 15.5180 | 18.4579 | 15.1173 | 12.2221 | 116.5337 |
| PRMP-35 | 210901-ZHSW-01    | a | 0.7041   | 0.5758  | 0.9470  | 0.9187  | 1.1473  | 0.7470  | 5.0399   |
|         |                   | b | 9.7064   | 12.6004 | 5.7666  | 8.6589  | 4.0118  | 3.1831  | 43.9272  |
| PRMP-36 | 210901-ZHSW-02    | a | 1.1790   | 0.9241  | 1.5069  | 1.5232  | 1.8021  | 1.1923  | 8.1276   |
|         |                   | b | 10.2154  | 13.2912 | 6.3208  | 9.3557  | 4.3791  | 4.1155  | 47.6777  |
| PRMP-37 | 210901-ZHSW-03    | a | 0.4006   | 0.4337  | 0.6855  | 0.6778  | 1.2504  | 0.7832  | 4.2312   |
|         |                   | b | 1.7872   | 1.4211  | 1.1617  | 0.9790  | 2.8423  | 0.9344  | 9.1257   |
| PRMP-38 | 210901-ZHSW-04    | a | 0.3237   | 0.2848  | 0.5146  | 0.4821  | 0.8723  | 0.5388  | 3.0163   |
|         |                   | b | 1.8007   | 1.3736  | 1.0419  | 0.8247  | 2.7158  | 0.6860  | 8.4427   |

|         |                      |   |         |         |         |         |        |        |          |
|---------|----------------------|---|---------|---------|---------|---------|--------|--------|----------|
| PMP-102 | 20211125-GSLM-S01    | a | 17.0679 | 14.5050 | 9.0876  | 6.2936  | 5.3782 | 4.0498 | 56.3821  |
|         |                      | b | 38.6649 | 40.5193 | 18.7000 | 21.8633 | 9.3863 | 9.6624 | 138.7962 |
| PRMP-39 | 20211125-GSLM-Z01    | a | 0.5539  | 0.4935  | 0.7721  | 0.7279  | 1.1970 | 0.7283 | 4.4727   |
|         |                      | b | 8.2831  | 8.9139  | 3.6980  | 3.7416  | 2.3123 | 4.2025 | 31.1514  |
| PRMP-40 | 20211125-GSLM-Z02    | a | 0.0105  | 0.0628  | 0.0842  | 0.0745  | 0.2354 | 0.1844 | 0.6518   |
|         |                      | b | 2.6300  | 2.1580  | 0.9343  | 0.6931  | 0.4627 | 0.2889 | 7.167    |
| PMP-103 | 20211125-NXMD-S01    | a | 3.9726  | 4.2099  | 1.7534  | 1.9107  | 0.4587 | 0.9961 | 13.3014  |
|         |                      | b | 10.1445 | 12.0110 | 5.0818  | 6.1240  | 1.6138 | 2.8649 | 37.84    |
| PMP-104 | 20211125-NXMD-S02    | a | 3.4603  | 3.7047  | 1.6167  | 1.7320  | 0.3367 | 0.9656 | 11.816   |
|         |                      | b | 9.3674  | 10.9149 | 4.7115  | 5.7122  | 1.5368 | 2.6325 | 34.8753  |
| PRMP-41 | 20211125-NXMD-Z01    | a | 0.6221  | 0.6292  | 0.8714  | 0.8857  | 1.6200 | 0.9862 | 5.6146   |
|         |                      | b | 9.0394  | 11.4930 | 5.7548  | 6.9258  | 5.0817 | 3.6129 | 41.9076  |
| PRMP-42 | 20211125-NXMD-Z02    | a | 0.5620  | 0.5758  | 0.7386  | 0.7648  | 1.1881 | 0.8109 | 4.6402   |
|         |                      | b | 3.8372  | 4.8570  | 2.2989  | 2.8650  | 2.1100 | 1.3989 | 17.367   |
| PRMP-43 | 20211125-NXMD-Z03    | a | 0.7753  | 0.6423  | 0.9090  | 0.9119  | 1.3366 | 0.8581 | 5.4332   |
|         |                      | b | 3.6593  | 4.5258  | 2.2215  | 2.7276  | 2.0168 | 1.4068 | 16.5578  |
| PRMP-44 | 20211125-NXMD-Z04    | a | 0.2921  | 0.3133  | 0.4455  | 0.4599  | 0.7954 | 0.5617 | 2.8679   |
|         |                      | b | 2.1871  | 2.1818  | 0.8462  | 1.0633  | 0.9216 | 0.6015 | 7.8015   |
| PRMP-45 | 20211125-NXMD-Z05    | a | 0.2982  | 0.3191  | 0.4083  | 0.4071  | 0.6881 | 0.4563 | 2.5771   |
|         |                      | b | 1.6812  | 1.6108  | 0.7975  | 0.8072  | 0.6677 | 0.4684 | 6.0328   |
| PRMP-46 | 20211125-NXMD-Z06    | a | 0.1925  | 0.2170  | 0.2865  | 0.2893  | 0.4430 | 0.3417 | 1.77     |
|         |                      | b | 1.4667  | 1.5280  | 0.6868  | 0.6324  | 0.4599 | 0.3526 | 5.1264   |
| PRMP-47 | 20211125-NXMD-Z07    | a | 0.1096  | 0.1438  | 0.2170  | 0.2015  | 0.3580 | 0.2787 | 1.3086   |
|         |                      | b | 2.1824  | 2.1786  | 0.9737  | 0.8895  | 0.5760 | 0.4152 | 7.2154   |
| PRMP-48 | 20211125-NXMD-Z08    | a | 0.3844  | 0.3813  | 0.4682  | 0.6027  | 1.0889 | 0.6636 | 3.5891   |
|         |                      | b | 2.0504  | 2.0275  | 1.2112  | 1.1527  | 1.2055 | 0.8873 | 8.5346   |
| PRMP-49 | 20211125-NXMD-Z09    | a | 0.2739  | 0.2703  | 0.4321  | 0.2925  | 0.7841 | 0.5118 | 2.5647   |
|         |                      | b | 1.9475  | 1.9160  | 1.0435  | 0.9482  | 0.7898 | 0.5333 | 7.1783   |
| PMP-105 | 20211129-JXJSTQT-S01 | a | 8.0383  | 6.6111  | 4.5575  | 4.4354  | 3.2835 | 2.6294 | 29.5552  |
|         |                      | b | 16.8478 | 17.8481 | 10.0183 | 12.3515 | 7.7830 | 7.1118 | 71.9605  |
| PMP-106 | 20211129-JXJSTQT-S02 | a | 7.3113  | 5.9471  | 4.1045  | 4.1419  | 3.0161 | 2.4577 | 26.9786  |
|         |                      | b | 14.6390 | 15.1368 | 8.9976  | 10.8256 | 7.6078 | 6.1482 | 63.355   |
| PMP-107 | 20211129-JXJSTQT-S03 | a | 6.3124  | 5.2137  | 0.3663  | 3.6448  | 2.5658 | 2.0656 | 20.1686  |
|         |                      | b | 13.3661 | 14.5035 | 8.1648  | 9.7667  | 6.7224 | 0.5479 | 53.0714  |
| PRMP-50 | 20211129-JXJSTQT-Z01 | a | 1.6930  | 1.4737  | 1.4912  | 1.5759  | 1.7862 | 1.2089 | 9.2289   |
|         |                      | b | 5.0023  | 6.1052  | 3.3191  | 4.7242  | 3.3439 | 2.8591 | 25.3538  |
| PRMP-51 | 20211129-JXJSTQT-Z02 | a | 0.8615  | 0.7525  | 0.8756  | 0.8972  | 1.2490 | 0.7921 | 5.4279   |
|         |                      | b | 3.3634  | 4.3430  | 2.1705  | 3.1590  | 2.3862 | 6.4389 | 21.861   |
| PRMP-52 | 20211129-JXJSTQT-Z03 | a | 0.7735  | 0.7292  | 0.8476  | 0.8719  | 1.2648 | 0.8535 | 5.3405   |
|         |                      | b | 2.7739  | 3.7426  | 1.9561  | 2.7397  | 2.2331 | 1.8595 | 15.3049  |
| PRMP-53 | 20211129-JXJSTQT-Z04 | a | 0.4397  | 0.4462  | 0.6415  | 0.6589  | 1.0305 | 0.7154 | 3.9322   |
|         |                      | b | 0.9125  | 0.9086  | 0.8276  | 0.8387  | 1.1262 | 0.8165 | 5.4301   |
| PRMP-54 | 20211129-JXJSTQT-Z05 | a | 0.4953  | 0.5069  | 0.7290  | 0.7469  | 1.1707 | 0.8400 | 4.4888   |
|         |                      | b | 0.4953  | 0.5069  | 0.7290  | 0.7469  | 1.1707 | 0.8400 | 4.4888   |
| PRMP-55 | 20211129-JXJSTQT-    | a | 0.5180  | 0.5301  | 0.6364  | 0.7886  | 1.2573 | 0.8430 | 4.5734   |

| Z06     |                   |   |          |          |         |          |          |         |          |
|---------|-------------------|---|----------|----------|---------|----------|----------|---------|----------|
|         |                   | b | 0.5180   | 0.5301   | 0.6364  | 0.7886   | 1.2573   | 0.8430  | 4.5734   |
| PMP-108 | 20211203-AGYPS01  | a | 23.4415  | 23.6801  | 17.4026 | 19.2068  | 23.2315  | 16.3325 | 123.295  |
|         |                   | b | 66.3944  | 71.4089  | 42.1844 | 47.3991  | 41.2125  | 28.6417 | 297.241  |
| PRMP-56 | 20211203-AGYPZ01  | a | 0.2132   | 0.2390   | 0.2325  | 0.2383   | 0.3264   | 0.2126  | 1.462    |
|         |                   | b | 0.6126   | 0.8095   | 0.5068  | 0.6396   | 0.5631   | 0.4442  | 3.5758   |
| PMP-109 | 20211203-BZLDS01  | a | 12.8844  | 13.3425  | 6.8638  | 7.3696   | 6.8254   | 5.1375  | 52.4232  |
|         |                   | b | 34.1335  | 34.5918  | 17.3008 | 19.2733  | 28.7589  | 10.5963 | 144.6546 |
| PMP-110 | 20211203-BZLDS02  | a | 5.1231   | 5.0238   | 2.4361  | 2.9265   | 3.2963   | 2.2619  | 21.0677  |
|         |                   | b | 16.6959  | 17.5800  | 9.0236  | 10.2709  | 25.7318  | 5.9877  | 85.2899  |
| PRMP-57 | 20211203-BZLDZ01  | a | 0.3301   | 0.2682   | 0.4310  | 0.3952   | 0.8133   | 0.4847  | 2.7225   |
|         |                   | b | 0.7294   | 0.7068   | 0.6026  | 0.5624   | 2.6628   | 0.6192  | 5.8832   |
| PRMP-58 | 20211203-BZLDZ02  | a | 0.1434   | 0.1268   | 0.2266  | 0.1930   | 0.4440   | 0.2264  | 1.3602   |
|         |                   | b | 0.4120   | 0.4536   | 0.3406  | 0.2610   | 2.4639   | 0.3116  | 4.2427   |
| PMP-111 | 20211222-AHWS01   | a | 9.9610   | 8.3938   | 7.9430  | 8.3028   | 8.2522   | 6.2447  | 49.0975  |
|         |                   | b | 19.5809  | 21.1166  | 13.2408 | 16.7674  | 11.4959  | 10.2873 | 92.4889  |
| PRMP-59 | 20211222-AHWSZ01  | a | 0.5812   | 0.4994   | 0.6757  | 0.7360   | 1.2311   | 0.7252  | 4.4486   |
|         |                   | b | 4.8122   | 7.3807   | 3.0067  | 4.7787   | 2.3619   | 1.9843  | 24.3245  |
| PRMP-60 | 20211222-AHWSZ02  | a | 1.5772   | 1.1321   | 2.5456  | 2.4493   | 3.0335   | 2.0031  | 12.7408  |
|         |                   | b | 11.9119  | 16.2899  | 7.6002  | 10.6428  | 5.9005   | 5.2866  | 57.6319  |
| PRMP-61 | 20211222-AHWSZ03  | a | 0.7742   | 0.5759   | 0.9751  | 0.9004   | 1.3555   | 0.9340  | 5.5151   |
|         |                   | b | 5.6427   | 7.8517   | 3.7808  | 5.2107   | 3.0722   | 2.8130  | 28.3711  |
| PRMP-62 | 20211222-AHWSZ04  | a | 0.4397   | 0.3820   | 0.5095  | 0.5786   | 0.9807   | 0.6468  | 3.5373   |
|         |                   | b | 5.5663   | 8.0215   | 3.2687  | 3.8327   | 2.4904   | 2.3194  | 25.499   |
| PRMP-63 | 20211222-AHWSZ05  | a | 0.5621   | 0.4886   | 0.6596  | 0.6028   | 0.8832   | 0.5974  | 3.7937   |
|         |                   | b | 5.5663   | 8.0215   | 3.2687  | 3.8327   | 2.4904   | 2.3194  | 25.499   |
| PRMP-64 | 20211222-AHWSZ06  | a | 2.4813   | 2.2017   | 2.6840  | 2.7579   | 3.3775   | 2.3193  | 15.8217  |
|         |                   | b | 5.8923   | 7.7525   | 4.8339  | 6.2915   | 3.9179   | 3.5849  | 32.273   |
| PMP-112 | 20220104-ZJTJTS01 | a | 7.9084   | 5.7814   | 3.9883  | 4.0798   | 7.5635   | 2.7959  | 32.1173  |
|         |                   | b | 168.2470 | 183.6098 | 96.7821 | 115.6580 | 171.1238 | 83.1678 | 818.5885 |
| PMP-113 | 20220104-ZJTJTS02 | a | 4.5252   | 2.9416   | 2.0081  | 2.0314   | 3.7681   | 1.5587  | 16.8331  |
|         |                   | b | 105.7654 | 112.0035 | 59.8033 | 73.1122  | 101.1063 | 47.9756 | 499.7663 |
| PRMP-65 | 20220104-ZJTJTZ01 | a | 0.1803   | 0.1191   | 0.3239  | 0.2680   | 1.0985   | 0.4383  | 2.4281   |
|         |                   | b | 1.6618   | 1.2827   | 1.3453  | 1.1593   | 3.3503   | 1.2259  | 10.0253  |
| PRMP-66 | 20220104-ZJTJTZ02 | a | 0.2378   | 0.1913   | 0.3835  | 0.3397   | 1.4061   | 0.4890  | 3.0474   |
|         |                   | b | 2.4441   | 2.1331   | 1.8033  | 1.6068   | 4.6884   | 1.7011  | 14.3768  |
| PRMP-67 | 20220104-ZJTJTZ03 | a | 0.1986   | 0.1455   | 0.3437  | 0.2908   | 1.3083   | 0.4630  | 2.7499   |
|         |                   | b | 1.8810   | 1.5830   | 1.4473  | 1.2556   | 3.8051   | 1.4283  | 11.4003  |
| PRMP-68 | 20220104-ZJTJTZ04 | a | 0.1674   | 0.1138   | 0.3001  | 0.2508   | 0.9819   | 0.4153  | 2.2293   |
|         |                   | b | 1.5234   | 1.3277   | 1.1106  | 1.0160   | 2.8993   | 1.1180  | 8.995    |
| PRMP-69 | 20220104-ZJTJTZ05 | a | 0.0988   | 0.0657   | 0.2036  | 0.1724   | 0.7400   | 0.2866  | 1.5671   |
|         |                   | b | 1.3805   | 1.2493   | 0.8823  | 0.7537   | 2.4458   | 0.8661  | 7.5777   |
| PRMP-70 | 20220104-ZJTJTZ06 | a | 0.1155   | 0.0886   | 0.2259  | 0.1943   | 0.8371   | 0.3399  | 1.8013   |
|         |                   | b | 1.5746   | 1.5113   | 0.8547  | 0.7667   | 2.2989   | 0.9470  | 7.9532   |
| PRMP-71 | 20220104-ZJTJTZ07 | a | 0.1161   | 0.0756   | 0.2126  | 0.1766   | 0.7220   | 0.2844  | 1.5873   |
|         |                   | b | 0.5244   | 0.3083   | 0.5403  | 0.4493   | 1.6622   | 0.5864  | 4.0709   |
| PRMP-72 | 20220104-ZJTJTZ08 | a | 0.1781   | 0.1253   | 0.2899  | 0.2493   | 1.0819   | 0.3827  | 2.3072   |
|         |                   | b | 1.9596   | 1.7714   | 0.8134  | 0.7190   | 2.0498   | 0.8016  | 8.1148   |
| PRMP-73 | 20220104-ZJTJTZ09 | a | 0.3224   | 0.2509   | 0.4723  | 0.4395   | 1.4122   | 0.5618  | 3.4591   |
|         |                   | b | 1.0741   | 0.7340   | 1.1487  | 0.9822   | 3.1347   | 1.1161  | 8.1898   |
| PRMP-74 | 20220104-ZJTJTZ10 | a | 0.1300   | 0.0806   | 0.2281  | 0.1802   | 0.7311   | 0.2765  | 1.6265   |
|         |                   | b | 0.6259   | 0.3639   | 0.6156  | 0.5199   | 1.6216   | 0.5995  | 4.3464   |
| PRMP-75 | 20220104-ZJTJTZ11 | a | 0.3139   | 0.2261   | 0.5019  | 0.4631   | 1.8685   | 0.6598  | 4.0333   |

|         |                   |   |        |        |        |        |        |        |        |
|---------|-------------------|---|--------|--------|--------|--------|--------|--------|--------|
| PRMP-76 | 20220104-ZJTJTZ12 | b | 1.0700 | 0.8014 | 1.1843 | 1.0001 | 2.9821 | 1.2364 | 8.2743 |
|         |                   | a | 0.1169 | 0.0557 | 0.2038 | 0.1538 | 0.7024 | 0.2367 | 1.4693 |
|         |                   | b | 0.5400 | 0.2707 | 0.5324 | 0.3858 | 1.6724 | 0.5744 | 3.9757 |

<sup>a</sup> Content of six compounds before hydrolysis. <sup>b</sup> Content of six compounds after hydrolysis. <sup>Δ</sup> The sum of the contents of the six compounds. \* ND, under limits of quantitation.

**Table S3.** Contents of 6 compounds in different processed PMRP.

| Samples                |   | Contents of analytes (μg/g) |          |          |          |          |          | Total <sup>Δ</sup> |
|------------------------|---|-----------------------------|----------|----------|----------|----------|----------|--------------------|
|                        |   | 1                           | 2        | 3        | 4        | 5        | 6        |                    |
| PMR-12                 | a | 64.0366                     | 61.9686  | 63.8661  | 67.3944  | 46.2105  | 31.5802  | 335.0564           |
|                        | b | 120.4388                    | 135.7185 | 107.3601 | 123.1741 | 100.2338 | 75.8933  | 662.8186           |
| PMRP-Q <sub>2h</sub>   | a | 18.9556                     | 16.3818  | 30.4316  | 31.8016  | 48.8257  | 32.6669  | 179.0632           |
|                        | b | 70.2607                     | 102.1134 | 63.7564  | 90.7059  | 87.7598  | 70.8167  | 485.4129           |
| PMRP-Q <sub>4h</sub>   | a | 13.0024                     | 15.2831  | 24.3831  | 26.8371  | 51.1396  | 32.3053  | 162.9506           |
|                        | b | 48.5066                     | 57.2735  | 40.0598  | 5.4654   | 52.5756  | 41.2789  | 245.1598           |
| PMRP-Q <sub>8h</sub>   | a | 6.2447                      | 6.3921   | 14.3036  | 15.7129  | 34.0226  | 21.1398  | 97.8157            |
|                        | b | 20.7371                     | 27.4309  | 25.0324  | 29.8011  | 43.8235  | 28.8546  | 175.6796           |
| PMRP-Q <sub>12h</sub>  | a | 5.3355                      | 5.0120   | 11.1662  | 12.1042  | 23.5104  | 14.5950  | 71.7233            |
|                        | b | 16.1662                     | 17.2213  | 17.4848  | 18.2370  | 27.1005  | 15.6690  | 111.8788           |
| PMRP-Q <sub>18h</sub>  | a | 3.7783                      | 3.1680   | 6.7140   | 7.1954   | 14.1389  | 8.6923   | 43.6869            |
|                        | b | 8.7287                      | 7.1682   | 8.2284   | 7.6362   | 13.1687  | 7.2577   | 52.1879            |
| PMRP-Q <sub>24h</sub>  | a | 3.0092                      | 2.8972   | 6.7266   | 7.2435   | 19.9856  | 11.8687  | 51.7308            |
|                        | b | 5.6497                      | 3.6530   | 6.6779   | 6.1935   | 17.1603  | 9.9430   | 49.2774            |
| PMRP-Q <sub>30h</sub>  | a | 1.7665                      | 1.3834   | 3.4854   | 3.7352   | 10.2495  | 6.3358   | 26.9558            |
|                        | b | 3.4439                      | 1.6435   | 3.1820   | 2.7095   | 8.7468   | 4.9429   | 24.6686            |
| PMRP-Q <sub>36h</sub>  | a | 0.7297                      | 0.3176   | 1.2856   | 1.3326   | 4.2633   | 2.6219   | 10.5507            |
|                        | b | 1.8461                      | 0.2523   | 0.7231   | 0.4232   | 3.0572   | 1.9083   | 8.2102             |
| PMRP-Q <sub>48h</sub>  | a | 0.3402                      | 0.0280   | 0.2321   | 0.1881   | 1.9912   | 1.3101   | 4.0897             |
|                        | b | 0.5001                      | 0.0314   | 0.0491   | 0.0657   | 1.6723   | 0.5157   | 2.8343             |
| PMRP-H <sub>2h</sub>   | a | 20.9902                     | 21.8696  | 28.4251  | 31.9708  | 39.6297  | 28.1394  | 171.0248           |
|                        | b | 63.4527                     | 68.8679  | 49.1361  | 73.4823  | 62.4058  | 51.7436  | 369.0884           |
| PMRP-H <sub>4h</sub>   | a | 8.1951                      | 10.1411  | 18.9248  | 21.1948  | 30.7772  | 21.0535  | 110.2865           |
|                        | b | 65.6631                     | 84.5382  | 53.3097  | 77.1076  | 65.1215  | 51.8454  | 397.5855           |
| PMRP-H <sub>8h</sub>   | a | 12.1234                     | 10.6589  | 17.9266  | 20.6275  | 38.1601  | 23.0745  | 122.571            |
|                        | b | 37.5893                     | 39.2741  | 32.1817  | 40.0811  | 54.7227  | 33.7200  | 237.5689           |
| PMRP-H <sub>12h</sub>  | a | 6.4994                      | 5.7148   | 11.5422  | 12.9585  | 28.9288  | 17.6924  | 83.3361            |
|                        | b | 16.1651                     | 14.1932  | 16.0455  | 17.0635  | 29.7911  | 31.5844  | 124.8428           |
| PMRP-H <sub>18h</sub>  | a | 5.2238                      | 4.5126   | 9.1178   | 10.2694  | 24.1647  | 14.7018  | 67.9901            |
|                        | b | 11.5213                     | 8.4062   | 11.4125  | 11.0249  | 22.1878  | 36.7544  | 101.3071           |
| PMRP-H <sub>24h</sub>  | a | 2.2879                      | 1.8355   | 4.0756   | 4.5144   | 12.6265  | 6.0676   | 31.4075            |
|                        | b | 5.5322                      | 3.1120   | 4.3918   | 3.8561   | 7.4316   | 15.1691  | 39.4928            |
| PMRP-H <sub>30h</sub>  | a | 0.3050                      | 0.6112   | 1.4130   | 1.5472   | 6.5773   | 3.1770   | 13.6307            |
|                        | b | 2.4251                      | 1.0572   | 1.8457   | 0.9974   | 4.4050   | 7.9425   | 18.6729            |
| PMRP-H <sub>36h</sub>  | a | 0.9028                      | 1.0557   | 2.2873   | 2.4509   | 5.4007   | 4.2033   | 16.3007            |
|                        | b | 1.2280                      | 0.9057   | 1.8306   | 1.5343   | 5.6702   | 10.5082  | 21.677             |
| PMRP-H <sub>48h</sub>  | a | 0.0237                      | 0.0246   | 0.1125   | 0.0615   | 3.9789   | 1.1233   | 5.3245             |
|                        | b | 0.5041                      | 0.0397   | 0.0732   | 0.0714   | 0.2355   | 2.8083   | 3.7322             |
| PMR-57                 | a | 39.8238                     | 38.4998  | 50.6853  | 44.1359  | 113.3277 | 73.5961  | 360.0686           |
|                        | b | 194.2306                    | 215.0783 | 157.6543 | 194.0987 | 231.6045 | 156.7588 | 1149.4252          |
| PMRP-JZJZ <sub>1</sub> | a | 0.0076                      | 0.0137   | 0.0062   | 0.0089   | 0.0140   | 0.0071   | 0.0575             |
|                        | b | 20.8615                     | 25.2909  | 15.1541  | 20.9782  | 17.2611  | 12.1074  | 111.6532           |
| PMRP-JZJZ <sub>2</sub> | a | ND *                        | 0.0121   | ND *     | 0.0043   | 0.0061   | 0.0050   | 0.0275             |
|                        | b | 11.4996                     | 10.7753  | 6.3152   | 5.8715   | 4.8142   | 1.7191   | 40.9949            |

|                        |   |         |         |         |         |         |        |         |
|------------------------|---|---------|---------|---------|---------|---------|--------|---------|
| PMRP-JZJZ <sub>3</sub> | a | ND *    | 0.0059  | ND *    | ND *    | 0.0084  | 0.0054 | 0.0197  |
|                        | b | 6.3052  | 3.1961  | 2.1552  | 0.9323  | 1.0926  | 0.2430 | 13.9244 |
| PMRP-JZJZ <sub>4</sub> | a | ND *    | ND *   | 0       |
|                        | b | 0.5496  | 0.1522  | 0.0323  | 0.0140  | 0.0283  | 0.0076 | 0.784   |
| PMRP-JZJZ <sub>5</sub> | a | ND *    | ND *   | 0       |
|                        | b | 0.0361  | 0.0081  | ND *    | ND *    | ND *    | ND *   | 0.0442  |
| PMRP-JZJZ <sub>6</sub> | a | ND *    | ND *    | ND *    | ND *    | 0.0068  | 0.0035 | 0.0103  |
|                        | b | ND *    | ND *    | ND *    | ND *    | 0.0171  | 0.0080 | 0.0251  |
| PMRP-JZJZ <sub>7</sub> | a | ND *    | ND *   | 0       |
|                        | b | 0.0149  | 0.0100  | 0.0109  | 0.0145  | 0.0221  | 0.0126 | 0.085   |
| PMRP-JZJZ <sub>8</sub> | a | ND *    | ND *   | 0       |
|                        | b | 0.0131  | 0.0105  | 0.0129  | 0.0169  | 0.0243  | 0.0186 | 0.0963  |
| PMRP-JZJZ <sub>9</sub> | a | ND *    | ND *   | 0       |
|                        | b | 0.0344  | 0.1883  | 0.0352  | 0.0501  | 0.0678  | 0.1770 | 0.5528  |
| PRMP-DZ                | a | 0.1385  | 0.3255  | 0.5710  | 0.7077  | 1.9649  | 1.7291 | 5.4367  |
|                        | b | 13.4136 | 16.0378 | 10.4085 | 14.3622 | 13.8245 | 9.5942 | 77.6408 |

<sup>a</sup> Content of six compounds before hydrolysis. <sup>b</sup> Content of six compounds after hydrolysis. <sup>△</sup> The sum of the contents of the six compounds. \* ND, under limits of quantitation.

**Table S4.** Sample collection information of PMR.

| Samples | Batch Number | Source                             | Collect Time |
|---------|--------------|------------------------------------|--------------|
| PMR-01  | AHBZ202001   | Bozhou, Anhui Province, China      | 2020.8.7     |
| PMR-02  | AHBZ202002   | Bozhou, Anhui Province, China      | 2020.8.7     |
| PMR-03  | AHBZ202003   | Bozhou, Anhui Province, China      | 2020.8.7     |
| PMR-04  | AHBZ202004   | Bozhou, Anhui Province, China      | 2020.8.7     |
| PMR-05  | AHBZ202005   | Bozhou, Anhui Province, China      | 2020.8.7     |
| PMR-06  | AH FY202001  | Bozhou, Anhui Province, China      | 2020.8.7     |
| PMR-07  | AH FY202002  | Bozhou, Anhui Province, China      | 2020.8.7     |
| PMR-08  | AH FY202003  | Bozhou, Anhui Province, China      | 2020.8.7     |
| PMR-09  | AH FY202004  | Bozhou, Anhui Province, China      | 2020.8.7     |
| PMR-10  | AH FY202005  | Bozhou, Anhui Province, China      | 2020.8.7     |
| PMR-11  | GDGZ202002   | Gaozhou, Guangdong Province, China | 2020.8.3     |
| PMR-12  | GDGZ202003   | Gaozhou, Guangdong Province, China | 2020.8.3     |
| PMR-13  | GDGZ202004   | Gaozhou, Guangdong Province, China | 2020.8.3     |
| PMR-14  | GDGZ202005   | Gaozhou, Guangdong Province, China | 2020.8.3     |
| PMR-15  | SCDZ202001   | Dazhou, Sichuan Province, China    | 2020.12.29   |
| PMR-16  | SCDZ202002   | Dazhou, Sichuan Province, China    | 2020.12.29   |
| PMR-17  | SCDZ202003   | Dazhou, Sichuan Province, China    | 2020.12.29   |
| PMR-18  | SCDZ202004   | Dazhou, Sichuan Province, China    | 2020.12.29   |
| PMR-19  | SCDZ202005   | Dazhou, Sichuan Province, China    | 2020.12.29   |
| PMR-20  | SCYB202001   | Yibin, Sichuan Province, China     | 2020.8.20    |
| PMR-21  | SCYB202002   | Yibin, Sichuan Province, China     | 2020.8.20    |
| PMR-22  | SCYB202003   | Yibin, Sichuan Province, China     | 2020.8.20    |
| PMR-23  | SCYB202004   | Yibin, Sichuan Province, China     | 2020.8.20    |
| PMR-24  | SCYB202005   | Yibin, Sichuan Province, China     | 2020.8.20    |
| PMR-25  | GZKL202001   | Kaili, Guizhou Province, China     | 2020.11.17   |
| PMR-26  | GZKL202002   | Kaili, Guizhou Province, China     | 2020.11.17   |
| PMR-27  | GZKL202003   | Kaili, Guizhou Province, China     | 2020.11.17   |
| PMR-28  | GZKL202004   | Kaili, Guizhou Province, China     | 2020.11.17   |
| PMR-29  | GZKL202005   | Kaili, Guizhou Province, China     | 2020.11.17   |



---

|        |              |                                   |            |
|--------|--------------|-----------------------------------|------------|
| PMR-30 | GZBJ202001   | Bijie, Guizhou Province, China    | 2020.11.17 |
| PMR-31 | GZBJ202002   | Bijie, Guizhou Province, China    | 2020.11.17 |
| PMR-32 | GZBJ202003   | Bijie, Guizhou Province, China    | 2020.11.17 |
| PMR-33 | GZBJ202004   | Bijie, Guizhou Province, China    | 2020.11.17 |
| PMR-34 | GZBJ202005   | Bijie, Guizhou Province, China    | 2020.11.17 |
| PMR-35 | GZAS202001   | Anshun, Guizhou Province, China   | 2020.11.17 |
| PMR-36 | GZAS202002   | Anshun, Guizhou Province, China   | 2020.11.17 |
| PMR-37 | GZAS202003   | Anshun, Guizhou Province, China   | 2020.11.17 |
| PMR-38 | GZAS202004   | Anshun, Guizhou Province, China   | 2020.11.17 |
| PMR-39 | GZAS202005   | Anshun, Guizhou Province, China   | 2020.11.17 |
| PMR-40 | GZTR202001   | Tongren, Guizhou Province, China  | 2020.11.17 |
| PMR-41 | GZTR202002   | Tongren, Guizhou Province, China  | 2020.11.17 |
| PMR-42 | GZTR202003   | Tongren, Guizhou Province, China  | 2020.11.17 |
| PMR-43 | GZTR202004   | Tongren, Guizhou Province, China  | 2020.11.17 |
| PMR-44 | GZTR202005   | Tongren, Guizhou Province, China  | 2020.11.17 |
| PMR-45 | YNHH20201101 | Honghe, Yunnan Province, China    | 2020.11.13 |
| PMR-46 | YNWS202002   | Wenshan, Yunnan Province, China   | 2020.8.12  |
| PMR-47 | YNWS202003   | Wenshan, Yunnan Province, China   | 2020.8.12  |
| PMR-48 | YNWS202004   | Wenshan, Yunnan Province, China   | 2020.8.12  |
| PMR-49 | YNWS202005   | Wenshan, Yunnan Province, China   | 2020.8.12  |
| PMR-50 | YNQJ202001   | Qujing, Yunnan Province, China    | 2020.8.12  |
| PMR-51 | YNQJ202002   | Qujing, Yunnan Province, China    | 2020.8.12  |
| PMR-52 | YNQJ202003   | Qujing, Yunnan Province, China    | 2020.8.12  |
| PMR-53 | YNQJ202004   | Qujing, Yunnan Province, China    | 2020.8.12  |
| PMR-54 | YNQJ202005   | Qujing, Yunnan Province, China    | 2020.8.12  |
| PMR-55 | YNQJ20201101 | Qujing, Yunnan Province, China    | 2020.11.13 |
| PMR-56 | GDDQ202109   | DeQing, Guangdong Province, China | Unknown    |
| PMR-57 | GDDQ2020     | DeQing, Guangdong Province, China | Unknown    |
| PMR-58 | GDDQ-1NQ-1   | DeQing, Guangdong Province, China | 2021.11.29 |
| PMR-59 | GDDQ-1NQ-2   | DeQing, Guangdong Province, China | 2021.11.29 |
| PMR-60 | GDDQ-1NQ-3   | DeQing, Guangdong Province, China | 2021.11.29 |
| PMR-61 | GDDQ-1NQ-4   | DeQing, Guangdong Province, China | 2021.11.29 |
| PMR-62 | GDDQ-1NQ-5   | DeQing, Guangdong Province, China | 2021.11.29 |
| PMR-63 | GDDQ-2NQ-1   | DeQing, Guangdong Province, China | 2021.11.29 |
| PMR-64 | GDDQ-2NQ-2   | DeQing, Guangdong Province, China | 2021.11.29 |
| PMR-65 | GDDQ-2NQ-3   | DeQing, Guangdong Province, China | 2021.11.29 |
| PMR-66 | GDDQ-2NQ-4   | DeQing, Guangdong Province, China | 2021.11.29 |
| PMR-67 | GDDQ-2NQ-5   | DeQing, Guangdong Province, China | 2021.11.29 |
| PMR-68 | GDDQ-3NQ-1   | DeQing, Guangdong Province, China | 2021.11.29 |
| PMR-69 | GDDQ-3NQ-2   | DeQing, Guangdong Province, China | 2021.11.29 |
| PMR-70 | GDDQ-3NQ-3   | DeQing, Guangdong Province, China | 2021.11.29 |
| PMR-71 | GDDQ-3NQ-4   | DeQing, Guangdong Province, China | 2021.11.29 |
| PMR-72 | GDDQ-3NQ-5   | DeQing, Guangdong Province, China | 2021.11.29 |
| PMR-73 | GDDQ-4NQ-1   | DeQing, Guangdong Province, China | 2021.11.29 |
| PMR-74 | GDDQ-4NQ-2   | DeQing, Guangdong Province, China | 2021.11.29 |
| PMR-75 | GDDQ-4NQ-3   | DeQing, Guangdong Province, China | 2021.11.29 |
| PMR-76 | GDDQ-4NQ-4   | DeQing, Guangdong Province, China | 2021.11.29 |
| PMR-77 | GDDQ-4NQ-5   | DeQing, Guangdong Province, China | 2021.11.29 |
| PMR-78 | GDDQ-5NQ-1   | DeQing, Guangdong Province, China | 2021.11.29 |

---

|         |                      |                                                            |            |
|---------|----------------------|------------------------------------------------------------|------------|
| PMR-79  | GDDQ-5NQ-2           | DeQing, Guangdong Province, China                          | 2021.11.29 |
| PMR-80  | GDDQ-5NQ-3           | DeQing, Guangdong Province, China                          | 2021.11.29 |
| PMR-81  | GDDQ-5NQ-4           | DeQing, Guangdong Province, China                          | 2021.11.29 |
| PMR-82  | GDDQ-5NQ-5           | DeQing, Guangdong Province, China                          | 2021.11.29 |
| PMR-83  | GDDQ-6NQ-1           | DeQing, Guangdong Province, China                          | 2021.11.29 |
| PMR-84  | GDDQ-6NQ-2           | DeQing, Guangdong Province, China                          | 2021.11.29 |
| PMR-85  | GDDQ-6NQ-3           | DeQing, Guangdong Province, China                          | 2021.11.29 |
| PMR-86  | GDDQ-6NQ-4           | DeQing, Guangdong Province, China                          | 2021.11.29 |
| PMR-87  | GDDQ-6NQ-5           | DeQing, Guangdong Province, China                          | 2021.11.29 |
| PMR-88  | GDDQ-5NC-1           | DeQing, Guangdong Province, China                          | 2021.4.29  |
| PMR-89  | GDDQ-5NC-2           | DeQing, Guangdong Province, China                          | 2021.4.29  |
| PMR-90  | GDDQ-5NC-3           | DeQing, Guangdong Province, China                          | 2021.4.29  |
| PMR-91  | GDDQ-5NC-4           | DeQing, Guangdong Province, China                          | 2021.4.29  |
| PMR-92  | GDDQ-5NC-5           | DeQing, Guangdong Province, China                          | 2021.4.29  |
| PMR-93  | GDDQ-5NX-1           | DeQing, Guangdong Province, China                          | 2021.8.18  |
| PMR-94  | GDDQ-5NX-2           | DeQing, Guangdong Province, China                          | 2021.8.18  |
| PMR-95  | GDDQ-5NX-3           | DeQing, Guangdong Province, China                          | 2021.8.18  |
| PMR-96  | GDDQ-5NX-4           | DeQing, Guangdong Province, China                          | 2021.8.18  |
| PMR-97  | GDDQ-5NX-5           | DeQing, Guangdong Province, China                          | 2021.8.18  |
| PMP-98  | 20211122-GSJN-S01    | Gansu Guocao Pharmaceutical Co.                            | 2021.11.22 |
| PMP-99  | 20211122-GSJN-S02    | Gansu Guocao Pharmaceutical Co.                            | 2021.11.22 |
| PMP-100 | 210901-1             | JiuZhouTong HuangGang JinGui Factory                       | 2021.9.1   |
| PMP-101 | 210901-2             | JiuZhouTong HuangGang JinGui Factory                       | 2021.9.1   |
| PMP-102 | 20211125-GSLM-S01    | Gansu Longmai Herbs Co.                                    | 2021.11.25 |
| PMP-103 | 20211125-NXMD-S01    | Ningxia Mingde Chinese Medicine Co.                        | 2021.11.25 |
| PMP-104 | 20211125-NXMD-S02    | Ningxia Mingde Chinese Medicine Co.                        | 2021.11.25 |
| PMP-105 | 20211129-JXZSTQT-S01 | Jiangxi Zhangshu Traditional Chinese Medicine Pills Co.    | 2021.11.29 |
| PMP-106 | 20211129-JXZSTQT-S02 | Jiangxi Zhangshu Traditional Chinese Medicine Pills Co.    | 2021.11.29 |
| PMP-107 | 20211129-JXZSTQT-S03 | Jiangxi Zhangshu Traditional Chinese Medicine Pills Co.    | 2021.11.29 |
| PMP-108 | 20211203-AGYPS01     | Anguo Factory                                              | 2021.12.03 |
| PMP-109 | 20211203-BZLDS01     | Bozhou Lindan Chinese Medicine Company                     | 2021.12.03 |
| PMP-110 | 20211203-BZLDS02     | Bozhou Lindan Chinese Medicine Co.                         | 2021.12.03 |
| PMP-111 | 20211222-AHWS01      | Anhui Wansheng Traditional Chinese Medicine Tablet Company | 2021.12.22 |
| PMP-112 | 20220104-ZJTJTS01    | Zhejiang Tongjuntang Traditional Chinese Medicine Co.      | 2022.1.4   |
| PMP-113 | 20220104-ZJTJTS02    | Zhejiang Tongjuntang Traditional Chinese Medicine Co.      | 2022.1.4   |

Table S5. Sample collection information of PMRP.

| Samples | Batch Number  | Source                         | Processing Method | Collect Time |
|---------|---------------|--------------------------------|-------------------|--------------|
| PRMP-01 | AHBZSC202001Z | Chinese herbal medicine market | Unknown           | 2020.7.28    |
| PRMP-02 | AHBZSC202002Z | Chinese herbal medicine market | Unknown           | 2020.7.28    |
| PRMP-03 | AHBZSC202003Z | Chinese herbal medicine market | Unknown           | 2020.7.28    |
| PRMP-04 | AHBZSC202004Z | Chinese herbal medicine market | Unknown           | 2020.7.28    |
| PRMP-05 | AHBZSC202005Z | Chinese herbal medicine market | Unknown           | 2020.7.28    |
| PRMP-06 | SW01          | Chinese herbal medicine market | Unknown           | Unknown      |
| PRMP-07 | SW02          | Chinese herbal medicine market | Unknown           | Unknown      |
| PRMP-08 | SW03          | Chinese herbal medicine market | Unknown           | Unknown      |
| PRMP-09 | SW04          | Chinese herbal medicine market | Unknown           | Unknown      |
| PRMP-10 | SW05          | Chinese herbal medicine market | Unknown           | Unknown      |
| PRMP-11 | SW06          | Chinese herbal medicine market | Unknown           | Unknown      |
| PRMP-12 | GXYLSC202001Z | Chinese herbal medicine market | Unknown           | 2020.7.27    |

|         |                   |                                              |                                        |            |
|---------|-------------------|----------------------------------------------|----------------------------------------|------------|
| PRMP-13 | SXXASC202001Z     | Chinese herbal medicine market               | Unknown                                | 2020.7.27  |
| PRMP-14 | HBAGSC202001Z     | Chinese herbal medicine market               | Unknown                                | 2020.7.27  |
| PRMP-15 | GDDQ              | Chinese herbal medicine market               | Unknown                                | Unknown    |
| PRMP-16 | AHWST01           | Chinese herbal medicine market               | Unknown                                | 2021.11.22 |
| PRMP-17 | AHWST02           | Chinese herbal medicine market               | Unknown                                | 2021.11.22 |
| PRMP-18 | AHWST03           | Chinese herbal medicine market               | Unknown                                | 2021.11.22 |
| PRMP-19 | AHWST04           | Chinese herbal medicine market               | Unknown                                | 2021.11.22 |
| PRMP-20 | AHWST05           | Chinese herbal medicine market               | Unknown                                | 2021.11.22 |
| PRMP-21 | AHWST06           | Chinese herbal medicine market               | Unknown                                | 2021.11.22 |
| PRMP-22 | AHWST07           | Chinese herbal medicine market               | Unknown                                | 2021.11.22 |
| PRMP-23 | 2015G0624         | Chinese herbal medicine market               | Unknown                                | Unknown    |
| PRMP-24 | 2015G0057         | Chinese herbal medicine market               | Unknown                                | Unknown    |
| PRMP-25 | 2015G0371         | Chinese herbal medicine market               | Unknown                                | Unknown    |
| PRMP-26 | 2015G0251         | Chinese herbal medicine market               | Unknown                                | Unknown    |
| PRMP-27 | 2015G0162         | Chinese herbal medicine market               | Unknown                                | Unknown    |
| PRMP-28 | 2015G0239         | Chinese herbal medicine market               | Unknown                                | Unknown    |
| PRMP-29 | 2015G0375         | Chinese herbal medicine market               | Unknown                                | Unknown    |
| PRMP-30 | 2015G0625         | Chinese herbal medicine market               | Unknown                                | Unknown    |
| PRMP-31 | 20211122-GSJN-Z01 | Gansu Guocao Pharmaceutical Co.              | Stewed for 4 h                         | 2021.11.22 |
| PRMP-32 | 20211122-GSJN-Z02 | Gansu Guocao Pharmaceutical Co.              | Stewed for 4 h                         | 2021.11.22 |
| PRMP-33 | 20211122-GSJN-Z03 | Gansu Guocao Pharmaceutical Co.              | Stewed for 8 h                         | 2021.11.22 |
| PRMP-34 | 20211122-GSJN-Z04 | Gansu Guocao Pharmaceutical Co.              | Stewed for 8 h                         | 2021.11.22 |
| PRMP-35 | 210901-ZHSW-01    | JiuZhouTong HuangGang JinGui Factory         | Steamed with black bean juice for 4 h  | 2021.9.1   |
| PRMP-36 | 210901-ZHSW-02    | JiuZhouTong HuangGang JinGui Factory         | Steamed with black bean juice for 4 h  | 2021.9.1   |
| PRMP-37 | 210901-ZHSW-03    | JiuZhouTong HuangGang JinGui Factory         | Steamed with black bean juice for 8 h  | 2021.9.1   |
| PRMP-38 | 210901-ZHSW-04    | JiuZhouTong HuangGang JinGui Factory         | Steamed with black bean juice for 8 h  | 2021.9.1   |
| PRMP-39 | 20211125-GSLM-Z01 | Gansu Longmai Herbs Co.                      | Steamed with black bean juice for 5 h  | 2021.11.25 |
| PRMP-40 | 20211125-GSLM-Z02 | Gansu Longmai Herbs Co.                      | Steamed with black bean juice for 10 h | 2021.11.25 |
| PRMP-41 | 20211125-NXMD-Z01 | Ningxia Mingde Chinese Medicine Co.          | Steamed with black bean juice for 8 h  | 2021.11.25 |
| PRMP-42 | 20211125-NXMD-Z02 | Ningxia Mingde Chinese Medicine Co.          | Steamed with black bean juice for 8 h  | 2021.11.25 |
| PRMP-43 | 20211125-NXMD-Z03 | Ningxia Mingde Chinese Medicine Co.          | Steamed with black bean juice for 8 h  | 2021.11.25 |
| PRMP-44 | 20211125-NXMD-Z04 | Ningxia Mingde Chinese Medicine Co.          | Steamed with black bean juice for 16 h | 2021.11.25 |
| PRMP-45 | 20211125-NXMD-Z05 | Ningxia Mingde Chinese Medicine Co.          | Steamed with black bean juice for 16 h | 2021.11.25 |
| PRMP-46 | 20211125-NXMD-Z06 | Ningxia Mingde Chinese Medicine Co.          | Steamed with black bean juice for 16 h | 2021.11.25 |
| PRMP-47 | 20211125-NXMD-Z07 | Ningxia Mingde Chinese Medicine Co.          | Steamed with black bean juice for 16 h | 2021.11.25 |
| PRMP-48 | 20211125-NXMD-Z08 | Ningxia Mingde Chinese Medicine Co.          | Steamed with black bean juice for 16 h | 2021.11.25 |
| PRMP-49 | 20211125-NXMD-Z09 | Ningxia Mingde Chinese Medicine Beverage Co. | Steamed with black bean juice for 16 h | 2021.11.25 |

|         |                      |                                                            |                                       |            |
|---------|----------------------|------------------------------------------------------------|---------------------------------------|------------|
| PRMP-50 | 20211129-JXZSTQT-Z01 | Jiangxi Zhangshu Traditional Chinese Medicine Pills Co.    | Steamed with black bean juice for 4 h | 2021.11.29 |
| PRMP-51 | 20211129-JXZSTQT-Z02 | Jiangxi Zhangshu Traditional Chinese Medicine Pills Co.    | Steamed with black bean juice for 4 h | 2021.11.29 |
| PRMP-52 | 20211129-JXZSTQT-Z03 | Jiangxi Zhangshu Traditional Chinese Medicine Pills Co.    | Steamed with black bean juice for 4 h | 2021.11.29 |
| PRMP-53 | 20211129-JXZSTQT-Z04 | Jiangxi Zhangshu Traditional Chinese Medicine Pills Co.    | Steamed with black bean juice for 8 h | 2021.11.29 |
| PRMP-54 | 20211129-JXZSTQT-Z05 | Jiangxi Zhangshu Traditional Chinese Medicine Pills Co.    | Steamed with black bean juice for 8 h | 2021.11.29 |
| PRMP-55 | 20211129-JXZSTQT-Z06 | Jiangxi Zhangshu Traditional Chinese Medicine Pills Co.    | Steamed with black bean juice for 8 h | 2021.11.29 |
| PRMP-56 | 20211203-AGYPZ01     | Anguo Factory                                              | High-pressure steamed                 | 2021.12.3  |
| PRMP-57 | 20211203-BZLDZ01     | Bozhou Lindan Chinese Medicine Co.                         | Steamed for 4 h-6 h                   | 2021.12.3  |
| PRMP-58 | 20211203-BZLDZ02     | Bozhou Lindan Chinese Medicine Co.                         | Steamed for 4 h-6 h                   | 2021.12.3  |
| PRMP-59 | 20211222-AHWSZ01     | Anhui Wansheng Traditional Chinese Medicine Tablet Company | Steamed for 2 h                       | 2021.11.22 |
| PRMP-60 | 20211222-AHWSZ02     | Anhui Wansheng Traditional Chinese Medicine Tablet Company | Steamed for 2 h                       | 2021.11.22 |
| PRMP-61 | 20211222-AHWSZ03     | Anhui Wansheng Traditional Chinese Medicine Tablet Company | Steamed for 3 h                       | 2021.11.22 |
| PRMP-62 | 20211222-AHWSZ04     | Anhui Wansheng Traditional Chinese Medicine Tablet Company | Steamed for 3 h                       | 2021.11.22 |
| PRMP-63 | 20211222-AHWSZ05     | Anhui Wansheng Traditional Chinese Medicine Tablet Company | Steamed for 4 h                       | 2021.11.22 |
| PRMP-64 | 20211222-AHWSZ06     | Anhui Wansheng Traditional Chinese Medicine Tablet Company | Steamed for 4 h                       | 2021.11.22 |
| PRMP-65 | 20220104-ZJTJTZ01    | Zhejiang Tongjuntang Traditional Chinese Medicine Co.      | Steamed for 6 h                       | 2022.4.1   |
| PRMP-66 | 20220104-ZJTJTZ02    | Zhejiang Tongjuntang Traditional Chinese Medicine Co.      | Steamed for 6 h                       | 2022.4.1   |
| PRMP-67 | 20220104-ZJTJTZ03    | Zhejiang Tongjuntang Traditional Chinese Medicine Co.      | Steamed for 6 h                       | 2022.4.1   |
| PRMP-68 | 20220104-ZJTJTZ04    | Zhejiang Tongjuntang Traditional Chinese Medicine Co.      | Steamed for 6 h                       | 2022.4.1   |
| PRMP-69 | 20220104-ZJTJTZ05    | Zhejiang Tongjuntang Traditional Chinese Medicine Co.      | Steamed for 6 h                       | 2022.4.1   |
| PRMP-70 | 20220104-ZJTJTZ06    | Zhejiang Tongjuntang Traditional Chinese Medicine Co.      | Steamed for 6 h                       | 2022.4.1   |
| PRMP-71 | 20220104-ZJTJTZ07    | Zhejiang Tongjuntang Traditional Chinese Medicine Co.      | Steamed for 12 h                      | 2022.4.1   |
| PRMP-72 | 20220104-ZJTJTZ08    | Zhejiang Tongjuntang Traditional Chinese Medicine Co.      | Steamed for 12 h                      | 2022.4.1   |
| PRMP-73 | 20220104-ZJTJTZ09    | Zhejiang Tongjuntang Traditional Chinese Medicine Co.      | Steamed for 12 h                      | 2022.4.1   |
| PRMP-74 | 20220104-ZJTJTZ10    | Zhejiang Tongjuntang Traditional Chinese Medicine Co.      | Steamed for 12 h                      | 2022.4.1   |
| PRMP-75 | 20220104-ZJTJTZ11    | Zhejiang Tongjuntang Traditional Chinese Medicine Co.      | Steamed for 12 h                      | 2022.4.1   |
| PRMP-76 | 20220104-ZJTJTZ12    | Zhejiang Tongjuntang Traditional Chinese Medicine Co.      | Steamed for 12 h                      | 2022.4.1   |
